# Supplementary material
Source: MDPI journal article supplement (https://www.mdpi.com/2073-4395/11/6/1214)
Supplement: s1 [file s1]

Archive with 2 entries (2 files):
- Supplementary Table S1_Research workshops_FINAL.pdf
- Supplementary Table S2_Smallholder ADOPT Q&A_FINAL.pdf
