# Supplementary material
Source: MDPI journal article supplement (https://www.mdpi.com/2073-4395/11/6/1214)
Supplement: s1 [file s1 › Supplementary Table S1_Research workshops_FINAL.pdf]

**Table S1: Outline of the CIMMYT research workshops**

| <b>Research workshops</b> | <b>Date</b>         | <b>Goals</b>                                                                                                                          | <b>Presenters/facilitators</b>                                                                                       | <b>Participant information</b>                                                                                                                                                                                 | <b>Key contributions</b>                                                                                                                                        |
|---------------------------|---------------------|---------------------------------------------------------------------------------------------------------------------------------------|----------------------------------------------------------------------------------------------------------------------|----------------------------------------------------------------------------------------------------------------------------------------------------------------------------------------------------------------|-----------------------------------------------------------------------------------------------------------------------------------------------------------------|
| 1. Value-Ag               | 13/11/19<br>5/12/19 | Seminar and workshop to present/discuss CSIRO toolbox for rapid ex-ante evaluation of agricultural innovations in smallholder systems | M. Monjardino                                                                                                        | Approx. 15 participants, incl., systems agronomists, agric. economists, data managers/analysts, statisticians, research directors                                                                              | Discussions around:<br>1. Value-Ag potential for application to a CIMMYT-promoted technology e.g. CA;<br>2. MasAgro data for possible use in economic modelling |
| 2. Ex-ante impact         | 7/12/19             | Evaluation gap: ex-ante impact assessment tools and pathways for CIMMYT/ MasAgro technology and CSIRO impact                          | G. Kruseman (IMPACT, GAMS, TOA-MD)<br>K. Mottaleb (TOA-MD)<br>S. L. Ridaura (FARMDESIGN)<br>M. Monjardino (Value-Ag) | Approx. 10 participants, incl. agric. economists, agronomists, data managers/analysts (mix of ongoing and casual contributors)                                                                                 | Description and comparison of tools and applications; discussion of strengths and weaknesses of various approaches                                              |
| 3. Case-study development | 16/01/20            | Scenario design, data collection, IAT simulation                                                                                      | M. Monjardino                                                                                                        | 10-15 participants – including collaboration team on an ongoing basis (including via videolink from Guanajuato) and various specialists (e.g. database, maize, livestock, labour, machinery) on a casual basis | Joint effort to select technology and case-study region, assess data availability/ suitability, and populate/calibrate whole-farm simulation model              |
| 4. Adoption               | 24/1/20             | Detailed description of Smallholder ADOPT, generation of adoption curves                                                              | M. Monjardino                                                                                                        | 8-10 participants - collaboration team on an ongoing basis                                                                                                                                                     | Joint effort to generate adoption curves for the various CA scenarios                                                                                           |
