# Supplementary material
Source: MDPI journal article supplement (https://www.mdpi.com/2073-4395/11/6/1214)
Supplement: s1 [file s1 › Supplementary Table S2_Smallholder ADOPT Q&A_FINAL.pdf]

| Smallholder ADOPT questions              |                                                        | Conservation Agriculture (CA)                                                                      | No Tillage (NT)                 | Soil Cover (SC)                 | Crop Diversification (CD)       | NT + SC                         | NT + CD                         | SC + CD                         | CA + NewVar                     | CA + NewLeg                     |
|------------------------------------------|--------------------------------------------------------|----------------------------------------------------------------------------------------------------|---------------------------------|---------------------------------|---------------------------------|---------------------------------|---------------------------------|---------------------------------|---------------------------------|---------------------------------|
| Relative advantage for population        | 1 – Income/productivity orientation                    | A majority of the target households has maximising income/productivity as a strong motivation      |                                 |                                 |                                 |                                 |                                 |                                 |                                 |                                 |
|                                          | 2 – Local community benefit orientation                | A minority of the target households has benefits to their community/village as a strong motivation |                                 |                                 |                                 |                                 |                                 |                                 |                                 |                                 |
|                                          | 3 – Risk orientation                                   | A majority of the target households has minimising production risk as a strong motivation          |                                 |                                 |                                 |                                 |                                 |                                 |                                 |                                 |
|                                          | 4 – Enterprise scale                                   | About half of the of the target households depend highly on the enterprise(s)                      |                                 |                                 |                                 |                                 |                                 |                                 |                                 |                                 |
|                                          | 5 – Management horizon                                 | Almost none have a long-term management horizon                                                    |                                 |                                 |                                 |                                 |                                 |                                 |                                 |                                 |
|                                          | 6 – Short-term constraints                             | A majority currently have a severe short-term financial constraint                                 |                                 |                                 |                                 |                                 |                                 |                                 |                                 |                                 |
| Learnability of innovation               | 7 – Trialling ease                                     | Moderately triable                                                                                 | Difficult to trial              | Moderately triable              | Moderately triable              | Difficult to trial              | Difficult to trial              | Moderately triable              | Moderately triable              | Moderately triable              |
|                                          | 8 – Innovation complexity                              | Difficult to evaluate                                                                              | Moderately diff. to evaluate    | Slightly difficult to evaluate  | Moderately diff. to evaluate    | Moderately diff. to evaluate    | Moderately diff. to evaluate    | Moderately diff. to evaluate    | Difficult to evaluate           | Difficult to evaluate           |
|                                          | 9 – Observability                                      | Moderately observable                                                                              | Difficult to observe            | Easily observable               | Easily observable               | Moderately observable           | Moderately observable           | Easily observable               | Moderately observable           | Moderately observable           |
| Population ability to learn about innov. | 10 – Advisory support                                  | A minority use adviser                                                                             | A minority use adviser          | A minority use adviser          | A minority use adviser          | A minority use adviser          | A minority use adviser          | A minority use adviser          | A minority use adviser          | A minority use adviser          |
|                                          | 11 – Group involvement to discuss new farm practices   | About half participate                                                                             | About half participate          | About half participate          | About half participate          | About half participate          | About half participate          | About half participate          | About half participate          | About half participate          |
|                                          | 12 – Relative existing skills and knowledge            | A majority will need new skills                                                                    | A minority will need new skills | A minority will need new skills | A minority will need new skills | About half will need new skills | About half will need new skills | About half will need new skills | A majority will need new skills | A majority will need new skills |
|                                          | 13 – Innovation awareness                              | A minority are aware                                                                               | A minority are aware            | A minority are aware            | A minority are aware            | A minority are aware            | A minority are aware            | A minority are aware            | A minority are aware            | Never used in region            |
| Relative advantage of innovation         | 14 – Relative upfront cost of innovation               | Moderate initial investment                                                                        | Minor initial investment        | Minor initial investment        | Minor initial investment        | Minor initial investment        | Minor initial investment        | Minor initial investment        | Moderate initial investment     | Moderate initial investment     |
|                                          | 15 – Reversibility of innovation                       | Easily reversed                                                                                    | Easily reversed                 | Very easily reversed            | Very easily reversed            | Easily reversed                 | Easily reversed                 | Easily reversed                 | Easily reversed                 | Easily reversed                 |
|                                          | 16 – Income/productivity benefit in years that is used | Moderate advantage                                                                                 | Small advantage                 | No disadvantage                 | Small advantage                 | Moderate advantage              | Moderate advantage              | Moderate advantage              | Moderate advantage              | Moderate advantage              |
|                                          | 17 – Future income/productivity                        | Moderate advantage                                                                                 | Small advantage                 | Small advantage                 | Moderate advantage              | Moderate advantage              | Moderate advantage              | Moderate advantage              | Moderate advantage              | Moderate advantage              |
|                                          | 18 – Time until profit/prod. benefits are realised     | 2 years                                                                                            | 1 year                          | 3-5 years                       | 3-5 years                       | 3-5 years                       | 2 years                         | 3-5 years                       | 2 years                         | 3-5 years                       |
|                                          | 19 – Village/community costs & benefits                | Moderate advantage                                                                                 | Small advantage                 | Small advantage                 | Small advantage                 | Small advantage                 | Small advantage                 | Small advantage                 | Moderate advantage              | Moderate advantage              |
|                                          | 20 – Time to local village/community benefit           | 3-5 years                                                                                          | 6-10 years                      | 6-10 years                      | 3-5 years                       | 6-10 years                      | 6-10 years                      | 6-10 years                      | 6-10 years                      | 6-10 years                      |
|                                          | 21 – Risk exposure                                     | Moderate reduction in risk                                                                         | Small reduction in risk         | Small reduction in risk         | Small reduction in risk         | Moderate reduction in risk      | Moderate reduction in risk      | Moderate reduction in risk      | Large reduction in risk         | Large reduction in risk         |
|                                          | 22 – Ease and convenience                              | Moderate decrease                                                                                  | No decrease                     | Small decrease                  | Small decrease                  | Small decrease                  | Small decrease                  | Small decrease                  | Moderate decrease               | Moderate decrease               |
| Peak adoption (%)                        |                                                        | 31%                                                                                                | 17%                             | 6%                              | 23%                             | 41%                             | 47%                             | 41%                             | 39%                             | 35%                             |
| Time to peak adoption (years)            |                                                        | 20                                                                                                 | 18                              | 14                              | 15                              | 18                              | 18                              | 16                              | 20                              | 20                              |
